# Supplementary material
Source: MDPI journal article supplement (https://www.mdpi.com/search?q=molbank-2023-M1564)
Supplement: s002 [file molbank-2023-M1564-s002-mod.mol]

Pt_Py_2D.mol
  corina  01292310153D 1   1.00000     0.00000 
CORINA 4.4.0 0026  12.08.2021
 31 35  0  0  0  0  0  0  0  0999 V2000
   -1.6751   -0.4654    2.2571 Pt  0  0  0  0  0  0  0  0  0  0  0  0
   -1.7630    1.4821    2.8053 O   0  0  0  0  0  0  0  0  0  0  0  0
   -3.3569   -0.7450    1.1643 O   0  0  0  0  0  0  0  0  0  0  0  0
    0.0236   -0.8236    1.0933 N   0  0  0  0  0  0  0  0  0  0  0  0
   -1.6811   -1.7024    3.9417 N   0  0  0  0  0  0  0  0  0  0  0  0
    0.0021   -0.0041    0.0020 N   0  0  0  0  0  0  0  0  0  0  0  0
   -0.0034   -0.8246   -1.1155 C   0  0  0  0  0  0  0  0  0  0  0  0
    0.0238   -2.1177   -0.6088 C   0  0  0  0  0  0  0  0  0  0  0  0
    0.0357   -2.0108    0.7474 C   0  0  0  0  0  0  0  0  0  0  0  0
   -1.6573   -2.8845    3.5793 C   0  0  0  0  0  0  0  0  0  0  0  0
   -2.7524   -3.5505    4.0353 C   0  0  0  0  0  0  0  0  0  0  0  0
   -3.5100   -2.6360    4.7559 C   0  0  0  0  0  0  0  0  0  0  0  0
   -2.7990   -1.4481    4.6824 N   0  0  0  0  0  0  0  0  0  0  0  0
   -2.3719    2.2089    1.8093 C   0  0  0  0  0  0  0  0  0  0  0  0
   -3.6543    0.4224    0.4873 C   0  0  0  0  0  0  0  0  0  0  0  0
   -3.6879    1.7095    1.2707 C   0  0  0  0  0  0  0  0  0  0  0  0
   -4.4841    2.8132    0.5514 C   0  0  0  0  0  0  0  0  0  0  0  0
   -4.7985    1.7179    2.3367 C   0  0  0  0  0  0  0  0  0  0  0  0
   -5.7376    2.2514    1.2423 C   0  0  0  0  0  0  0  0  0  0  0  0
   -6.6384    3.2606    1.7028 O   0  0  0  0  0  0  0  0  0  0  0  0
   -8.0090    2.8564    1.7110 C   0  0  0  0  0  0  0  0  0  0  0  0
   -8.8645    3.9916    2.2115 C   0  0  0  0  0  0  0  0  0  0  0  0
   -1.8669    3.2186    1.3789 O   0  0  0  0  0  0  0  0  0  0  0  0
   -3.8818    0.4107   -0.6993 O   0  0  0  0  0  0  0  0  0  0  0  0
   -0.0178    1.4608    0.0101 C   0  0  0  0  0  0  0  0  0  0  0  0
   -3.1756   -0.1662    5.2834 C   0  0  0  0  0  0  0  0  0  0  0  0
   -9.3816    4.9127    1.3197 C   0  0  0  0  0  0  0  0  0  0  0  0
  -10.1666    5.9537    1.7788 C   0  0  0  0  0  0  0  0  0  0  0  0
  -10.4346    6.0738    3.1296 C   0  0  0  0  0  0  0  0  0  0  0  0
   -9.9175    5.1528    4.0213 C   0  0  0  0  0  0  0  0  0  0  0  0
   -9.1367    4.1087    3.5617 C   0  0  0  0  0  0  0  0  0  0  0  0
  1  2  1  0      
  1  3  1  0      
  1  4  1  0      
  1  5  1  0      
  4  6  1  0      
  6  7  1  0      
  7  8  2  0      
  8  9  1  0      
  9  4  2  0      
  5 10  2  0      
 10 11  1  0      
 11 12  2  0      
 12 13  1  0      
 13  5  1  0      
  2 14  1  0      
  3 15  1  0      
 14 16  1  0      
 15 16  1  0      
 16 17  1  0      
 16 18  1  0      
 18 19  1  0      
 19 17  1  0      
 19 20  1  0      
 20 21  1  0      
 21 22  1  0      
 14 23  2  0      
 15 24  2  0      
  6 25  1  0      
 13 26  1  0      
 22 27  2  0      
 27 28  1  0      
 28 29  2  0      
 29 30  1  0      
 30 31  2  0      
 31 22  1  0      
M  END
$$$$
