# Supplementary material
Source: MDPI journal article supplement (https://www.mdpi.com/search?q=molbank-2023-M1564)
Supplement: s003 [file molbank-2023-M1564-s003.inchi]

InChI=1/C13H14O5.2C4H6N2.Pt/c14-11(15)13(12(16)17)6-10(7-13)18-8-9-4-2-1-3-5-9;2*1-6-4-2-3-5-6;/h1-5,10H,6-8H2,(H,14,15)(H,16,17);2*2-4H,1H3;/q;;;+2/p-2
AuxInfo=1/1/N:11,10,12,9,13,4,14,7,8,5,2,30,3,1,15,29,31,6;22,19,18,20,17,21;28,25,24,26,23,27;16/E:(2,3)(4,5)(6,7)(11,12)(14,15,16,17);;;/gE:(1,2);;;/CRV:;2*5t;/rA:55OCCCCOCCCCCCCCOPtN4.3CCCNCN4.3CCCNCOCOHHHHHHHHHHHHHHHHHHHHHHHH/rB:d1;s2;s3;s4;s5;s6;s7;d8;s9;d10;s11;s8d12;s3s5;s2;s15;s16;d17;s18;d19;s17s20;s21;s16;d23;s24;d25;s23s26;s27;s16;s3s29;d30;s4;s4;s5;s7;s7;s9;s10;s11;s12;s13;s14;s14;s18;s19;s20;s22;s22;s22;s24;s25;s26;s28;s28;s28;/rC:1.5604,-2.878,-2.4957;1.807,-1.8222,-1.6687;.9338,-1.6207,-.2232;-.0309,-.1759,-.2288;-1.2851,-1.1149,.5166;-2.7612,-.7788,-.0395;-3.9395,-1.0328,1.0319;-5.4384,-.6438,.3289;-6.0045,.8048,.4504;-7.3769,1.163,-.1991;-8.1886,.0696,-.9604;-7.6255,-1.3807,-1.0764;-6.2503,-1.7373,-.4319;-.5608,-2.5065,-.2247;2.8921,-.7699,-2.02;4.2652,-.4674,-.2184;5.9878,-2.0786,-.2109;7.306,-1.9394,-.8614;8.1303,-3.2585,-.5921;7.256,-4.1983,.235;5.9277,-3.4966,.4854;4.6488,-4.1096,1.335;5.1721,1.71,-.2253;6.4383,2.1183,-.8658;6.6407,3.6639,-.6169;5.4555,4.1667,.2043;4.5328,2.9825,.4609;3.1134,3.0211,1.308;2.8842,-.7619,1.5786;1.8004,-1.8156,1.2272;1.5501,-2.8679,2.0576;-.3172,.2209,-1.3574;.4116,.7164,.4932;-1.2287,-1.1256,1.7454;-3.9393,-2.2159,1.3688;-3.7542,-.3249,2.0207;-5.3724,1.6578,1.0491;-7.8169,2.2959,-.1081;-9.2628,.3484,-1.4642;-8.2599,-2.235,-1.6708;-5.8105,-2.8703,-.5225;-.5457,-3.4995,.5012;-.9915,-2.7442,-1.3522;7.6921,-.9721,-1.4944;9.2628,-3.4881,-.9799;7.5657,-5.3108,.625;3.9048,-4.7224,.5707;5.0631,-4.8744,2.2048;4.0268,-3.1881,1.8615;7.195,1.3887,-1.4826;7.5794,4.3362,-1.0072;5.2794,5.3108,.5859;3.3384,2.7934,2.4957;2.5979,4.1321,1.1939;2.3479,2.1664,.8645;
