# Supplementary material
Source: MDPI journal article supplement (https://www.mdpi.com/search?q=molbank-2023-M1564)
Supplement: s003 [file molbank-2023-M1564-s003.mol]

Pt_Py_3D.mol
  ChemDraw01282311483D

 55 59  0  0  0  0  0  0  0  0999 V2000
    1.5604   -2.8780   -2.4957 O   0  0  0  0  0  0  0  0  0  0  0  0
    1.8070   -1.8222   -1.6687 C   0  0  0  0  0  0  0  0  0  0  0  0
    0.9338   -1.6207   -0.2232 C   0  0  0  0  0  0  0  0  0  0  0  0
   -0.0309   -0.1759   -0.2288 C   0  0  0  0  0  0  0  0  0  0  0  0
   -1.2851   -1.1149    0.5166 C   0  0  0  0  0  0  0  0  0  0  0  0
   -2.7612   -0.7788   -0.0395 O   0  0  0  0  0  0  0  0  0  0  0  0
   -3.9395   -1.0328    1.0319 C   0  0  0  0  0  0  0  0  0  0  0  0
   -5.4384   -0.6438    0.3289 C   0  0  0  0  0  0  0  0  0  0  0  0
   -6.0045    0.8048    0.4504 C   0  0  0  0  0  0  0  0  0  0  0  0
   -7.3769    1.1630   -0.1991 C   0  0  0  0  0  0  0  0  0  0  0  0
   -8.1886    0.0696   -0.9604 C   0  0  0  0  0  0  0  0  0  0  0  0
   -7.6255   -1.3807   -1.0764 C   0  0  0  0  0  0  0  0  0  0  0  0
   -6.2503   -1.7373   -0.4319 C   0  0  0  0  0  0  0  0  0  0  0  0
   -0.5608   -2.5065   -0.2247 C   0  0  0  0  0  0  0  0  0  0  0  0
    2.8921   -0.7699   -2.0200 O   0  0  0  0  0  0  0  0  0  0  0  0
    4.2652   -0.4674   -0.2184 Pt  0  0  0  0  0  0  0  0  0  0  0  0
    5.9878   -2.0786   -0.2109 N   0  0  0  0  0  0  0  0  0  0  0  0
    7.3060   -1.9394   -0.8614 C   0  0  0  0  0  0  0  0  0  0  0  0
    8.1303   -3.2585   -0.5921 C   0  0  0  0  0  0  0  0  0  0  0  0
    7.2560   -4.1983    0.2350 C   0  0  0  0  0  0  0  0  0  0  0  0
    5.9277   -3.4966    0.4854 N   0  0  0  0  0  0  0  0  0  0  0  0
    4.6488   -4.1096    1.3350 C   0  0  0  0  0  0  0  0  0  0  0  0
    5.1721    1.7100   -0.2253 N   0  0  0  0  0  0  0  0  0  0  0  0
    6.4383    2.1183   -0.8658 C   0  0  0  0  0  0  0  0  0  0  0  0
    6.6407    3.6639   -0.6169 C   0  0  0  0  0  0  0  0  0  0  0  0
    5.4555    4.1667    0.2043 C   0  0  0  0  0  0  0  0  0  0  0  0
    4.5328    2.9825    0.4609 N   0  0  0  0  0  0  0  0  0  0  0  0
    3.1134    3.0211    1.3080 C   0  0  0  0  0  0  0  0  0  0  0  0
    2.8842   -0.7619    1.5786 O   0  0  0  0  0  0  0  0  0  0  0  0
    1.8004   -1.8156    1.2272 C   0  0  0  0  0  0  0  0  0  0  0  0
    1.5501   -2.8679    2.0576 O   0  0  0  0  0  0  0  0  0  0  0  0
   -0.3172    0.2209   -1.3574 H   0  0  0  0  0  0  0  0  0  0  0  0
    0.4116    0.7164    0.4932 H   0  0  0  0  0  0  0  0  0  0  0  0
   -1.2287   -1.1256    1.7454 H   0  0  0  0  0  0  0  0  0  0  0  0
   -3.9393   -2.2159    1.3688 H   0  0  0  0  0  0  0  0  0  0  0  0
   -3.7542   -0.3249    2.0207 H   0  0  0  0  0  0  0  0  0  0  0  0
   -5.3724    1.6578    1.0491 H   0  0  0  0  0  0  0  0  0  0  0  0
   -7.8169    2.2959   -0.1081 H   0  0  0  0  0  0  0  0  0  0  0  0
   -9.2628    0.3484   -1.4642 H   0  0  0  0  0  0  0  0  0  0  0  0
   -8.2599   -2.2350   -1.6708 H   0  0  0  0  0  0  0  0  0  0  0  0
   -5.8105   -2.8703   -0.5225 H   0  0  0  0  0  0  0  0  0  0  0  0
   -0.5457   -3.4995    0.5012 H   0  0  0  0  0  0  0  0  0  0  0  0
   -0.9915   -2.7442   -1.3522 H   0  0  0  0  0  0  0  0  0  0  0  0
    7.6921   -0.9721   -1.4944 H   0  0  0  0  0  0  0  0  0  0  0  0
    9.2628   -3.4881   -0.9799 H   0  0  0  0  0  0  0  0  0  0  0  0
    7.5657   -5.3108    0.6250 H   0  0  0  0  0  0  0  0  0  0  0  0
    3.9048   -4.7224    0.5707 H   0  0  0  0  0  0  0  0  0  0  0  0
    5.0631   -4.8744    2.2048 H   0  0  0  0  0  0  0  0  0  0  0  0
    4.0268   -3.1881    1.8615 H   0  0  0  0  0  0  0  0  0  0  0  0
    7.1950    1.3887   -1.4826 H   0  0  0  0  0  0  0  0  0  0  0  0
    7.5794    4.3362   -1.0072 H   0  0  0  0  0  0  0  0  0  0  0  0
    5.2794    5.3108    0.5859 H   0  0  0  0  0  0  0  0  0  0  0  0
    3.3384    2.7934    2.4957 H   0  0  0  0  0  0  0  0  0  0  0  0
    2.5979    4.1321    1.1939 H   0  0  0  0  0  0  0  0  0  0  0  0
    2.3479    2.1664    0.8645 H   0  0  0  0  0  0  0  0  0  0  0  0
  1  2  2  0      
  2  3  1  0      
  2 15  1  0      
  3 30  1  0      
  3 14  1  0      
  3  4  1  0      
  4  5  1  0      
  4 32  1  0      
  4 33  1  0      
  5  6  1  0      
  5 14  1  0      
  5 34  1  0      
  6  7  1  0      
  7  8  1  0      
  7 35  1  0      
  7 36  1  0      
  8 13  1  0      
  8  9  2  0      
  9 10  1  0      
  9 37  1  0      
 10 11  2  0      
 10 38  1  0      
 11 12  1  0      
 11 39  1  0      
 12 13  2  0      
 12 40  1  0      
 13 41  1  0      
 14 42  1  0      
 14 43  1  0      
 15 16  1  0      
 16 17  1  0      
 16 23  1  0      
 16 29  1  0      
 17 21  1  0      
 17 18  2  0      
 18 19  1  0      
 18 44  1  0      
 19 20  2  0      
 19 45  1  0      
 20 21  1  0      
 20 46  1  0      
 21 22  1  0      
 22 47  1  0      
 22 48  1  0      
 22 49  1  0      
 23 27  1  0      
 23 24  2  0      
 24 25  1  0      
 24 50  1  0      
 25 26  2  0      
 25 51  1  0      
 26 27  1  0      
 26 52  1  0      
 27 28  1  0      
 28 53  1  0      
 28 54  1  0      
 28 55  1  0      
 29 30  1  0      
 30 31  2  0      
M  RAD  2  17   1  23   1
M  END
